# Supplementary material
Source: publisher site journal article supplement (https://www.dovepress.com/article/524742)
Supplement: Supplementary file 1 [file Supplemental%20materials_1.docx]

**
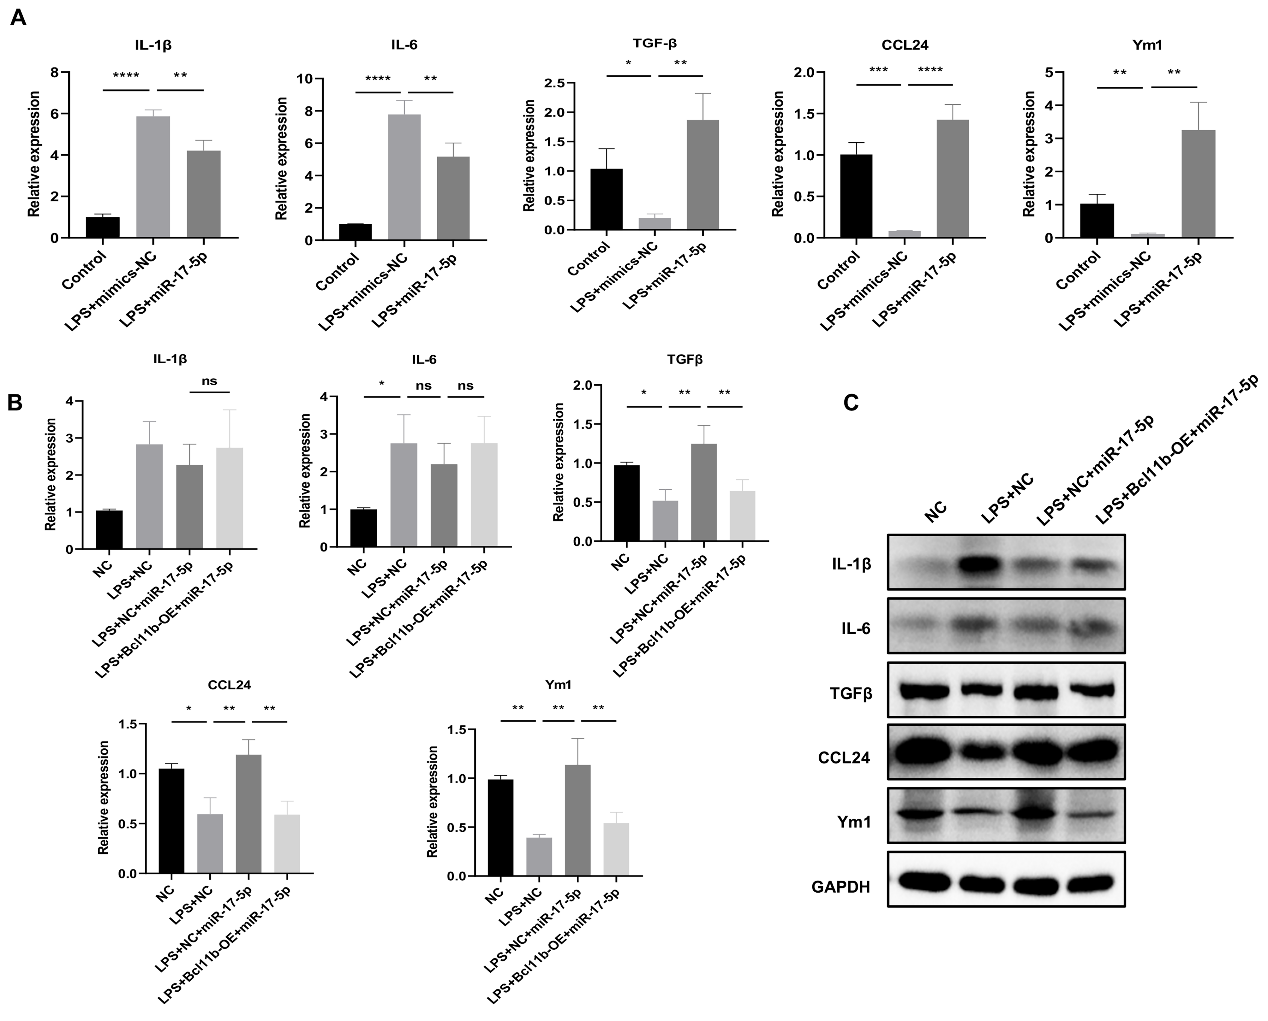
Figure S1. Detection of the expression of M1-type marker genes (IL-1β and IL-6) and M2-type marker genes (TGF-β, YM1, and CCL24).** (A) qRT-PCR was employed to assess M1-type marker genes (IL-1β and IL-6) and M2-type marker genes (TGF-β, YM1, and CCL24) levels. (B and C) Both qRT-PCR and Western blot were applied to analyze M1-type marker genes (IL-1β and IL-6) and M2-type marker genes (TGF-β, YM1, and CCL24) levels under the regulation of miR-17-5p and Bcl11b. **P* < 0.05, ***P* < 0.01, ****P* < 0.001, *****P* < 0.0001; ns, not significant.

**Table S1 Comparison of baseline data between healthy controls and patients with sepsis**

| Characteristic | Control group | Sepsis group | *P* |
| --- | --- | --- | --- |
|  | n=19 | n=27 |  |
| Gender, (female n (%)) | 7 (36.84) | 7 (25.93) | 0.428 |
| Age, years | 54.3 ± 16.15 | 58.70 ± 16.74 | 0.889 |
| APACHE II score | _ | 18.00 (8.00, 37.00) | - |
| SOFA score | _ | 12.00 (3.00, 22.00) | - |
| CRRT, n (%) | _ | 16 (59.26%) | - |
| Comorbidity |  |  | - |
| Hypertension, n (%) | 10 (52.63) | 9 (33.33) | 0.191 |
| Diabetes mellitus, n (%) | 2 (10.53) | 6 (22.22) | 0.440 |
| COPD, n (%) | 0 (0.00) | 1 (3.70) | 1.000 |
| Renal disease, n (%) | 2 (10.53) | 4 (14.81) | 0.625 |

**Table S2. Stratified Analysis of miRNA-17-5p Expression in Sepsis**

| Factor | Subgroup | Control group | Sepsis Group | *P* | *P*-Interaction |
| --- | --- | --- | --- | --- | --- |
|  |  | (n=19) | (n=27) |  |  |
| Age |  |  |  |  |  |
|  | ＜65y | 1.66 ± 1.45 (12) | 0.40 ± 0.56 (18) | 0.005 |  |
|  | ≥65y | 1.65 ± 2.50 (7) | 0.31 ± 0.27 (9) | 0.009 | 0.863 |
| Gender |  |  |  |  |  |
|  | Male | 1.19 ± 1.24 (12) | 0.35 ± 0.49 (20) | 0.043 |  |
|  | Female | 2.45 ± 2.17 (7) | 0.42 ± 0.48 (7) | 0.003 | 0.094 |
| Hypertension |  |  |  |  |  |
|  | No | 0.39 ± 1.80 (9) | 0.37 ± 0.53 (18) | 0.066 |  |
|  | Yes | 1.90 ± 1.68 (10) | 0.37 ± 0.39(9) | 0.004 | 0.531 |
| Diabetes |  |  |  |  |  |
|  | No | 1.74 ± 1.70 (17) | 0.31 ± 0.35 (21) | <0.0001 |  |
|  | Yes | 0.22± 0.27 (2) | 0.60 ± 0.80 (6) | 0.117 | 0.551 |

Data presented as Mean ± SD (sample size); Interaction p-values calculated using General linear model with Group × Stratification Factor interaction terms; Abbreviations: DM = Diabetes
